# Supplementary material
Source: Springer Nature journal article supplement (https://www.springermedizin.de/resource/supplementary/12916_2010_278_MOESM8_ESM.pdf/9599552)

**A.**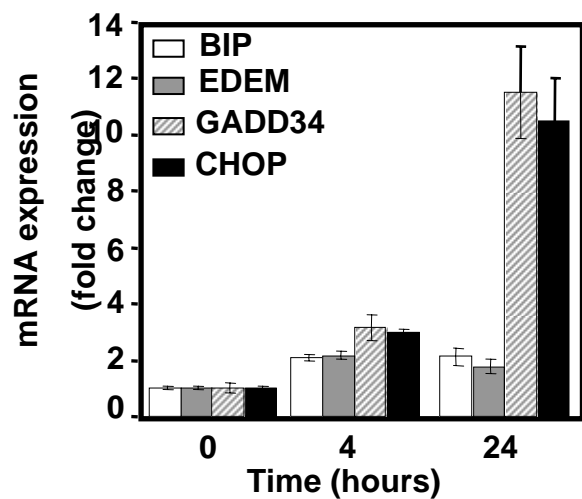**B.**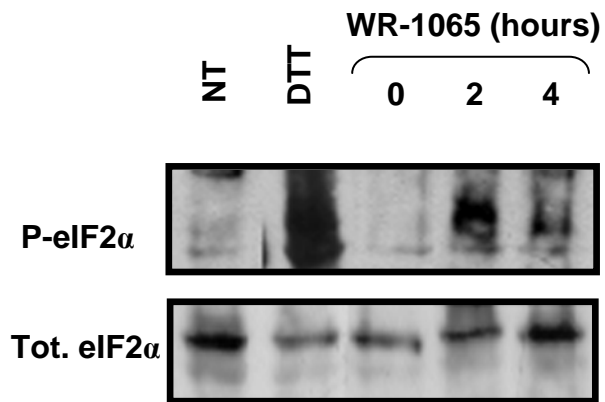**C.****ATF4**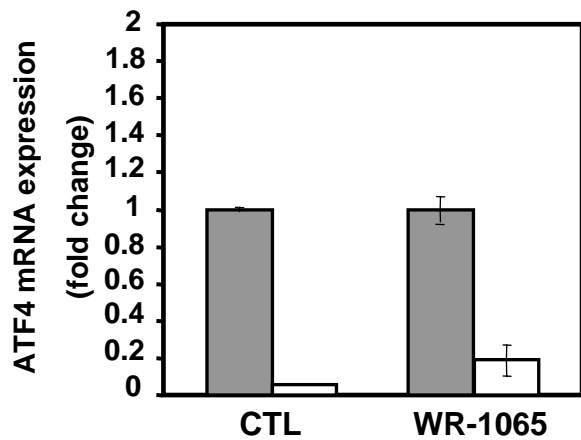**D.****VEGF-A**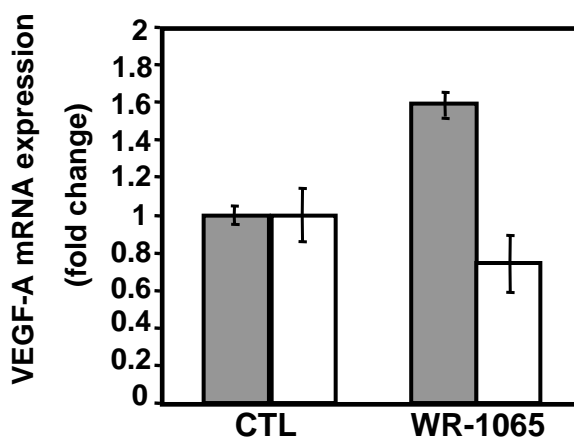

Supplement: MOESM8 [file 9599552]
